# Supplementary material
Source: PubMed Central journal article supplement (PMC7758835)
Supplement: jamacardiol-e206585-s001.pdf [file jamacardiol-e206585-s001.pdf]

## Supplementary Online Content

Gaudino M, Samadashvili Z, Hameed I, Chikwe J, Girardi LN, Hannan EL. Differences in long-term outcomes after coronary artery bypass surgery using single vs multiple arterial grafts and the association with sex. *JAMA Cardiol*. Published online December 23, 2020. doi:10.1001/jamacardio.2020.6585

### **eFigure.** Details of Patient Inclusion and Exclusion

**eTable 1.** Provider Volume and Baseline Patient Characteristics of Male Patients Undergoing Single-Arterial and Multiple-Arterial Isolated-Coronary Artery Bypass Grafting (CABG) Surgery in New York State From 2005-2014

**eTable 2.** Provider Volume and Baseline Patient Characteristics of Female Patients Undergoing Single-Arterial (SAG) and Multiple-Arterial (MAG) Isolated-Coronary Artery Bypass Grafting (CABG) Surgery in New York State From 2005-2014

**eTable 3.** Provider Volume and Baseline Characteristics of Propensity-Matched Male Patients Undergoing Single-Arterial and Multiple-Arterial Isolated-Coronary Artery Bypass Grafting (CABG) Surgery in New York State From 2005-2014

**eTable 4.** Provider Volume and Baseline Characteristics of Propensity-Matched Female Patients Undergoing Single-Arterial (SAG) and Multiple-Arterial (MAG) Isolated-Coronary Artery Bypass Grafting (CABG) Surgery in New York State From 2005-2014

**eTable 5.** Operative (In-Hospital/30 day) Mortality Rates of Female and Male Propensity Matched Patients

**eTable 6.** Seven-Year Mortality Rates of Propensity-Matched Risk-Stratified Female and Male Patients According to Different Low Risk Score Cut-Offs After Multiple- (MAG) vs Single-Arterial (SAG) Coronary Artery Bypass Grafting in New York State Between 2005-2014

**eTable 7.** Fully Adjusted Cox Regression Models Evaluating the Effect of Multiple Arterial Grafting (MAG) on Death in the Overall Population

**eTable 8.** Landmark Analysis of Alive Female and Male Low- and High-Risk Patients at 30 Days

**eTable 9.** Sensitivity Analysis Using Gamma Testing

**eTable 10.** Sensitivity Analysis Using E-Value

**eTable 11.** Fully Adjusted Cox Regression Models Comparing Mortality Between Female and Male Patients Receiving Single Arterial Grafts (SAG), and Female and Male Patients Receiving Multiple Arterial Grafts (MAG)

This supplementary material has been provided by the authors to give readers additional information about their work.

**eFigure.** Details of Patient Inclusion and Exclusion

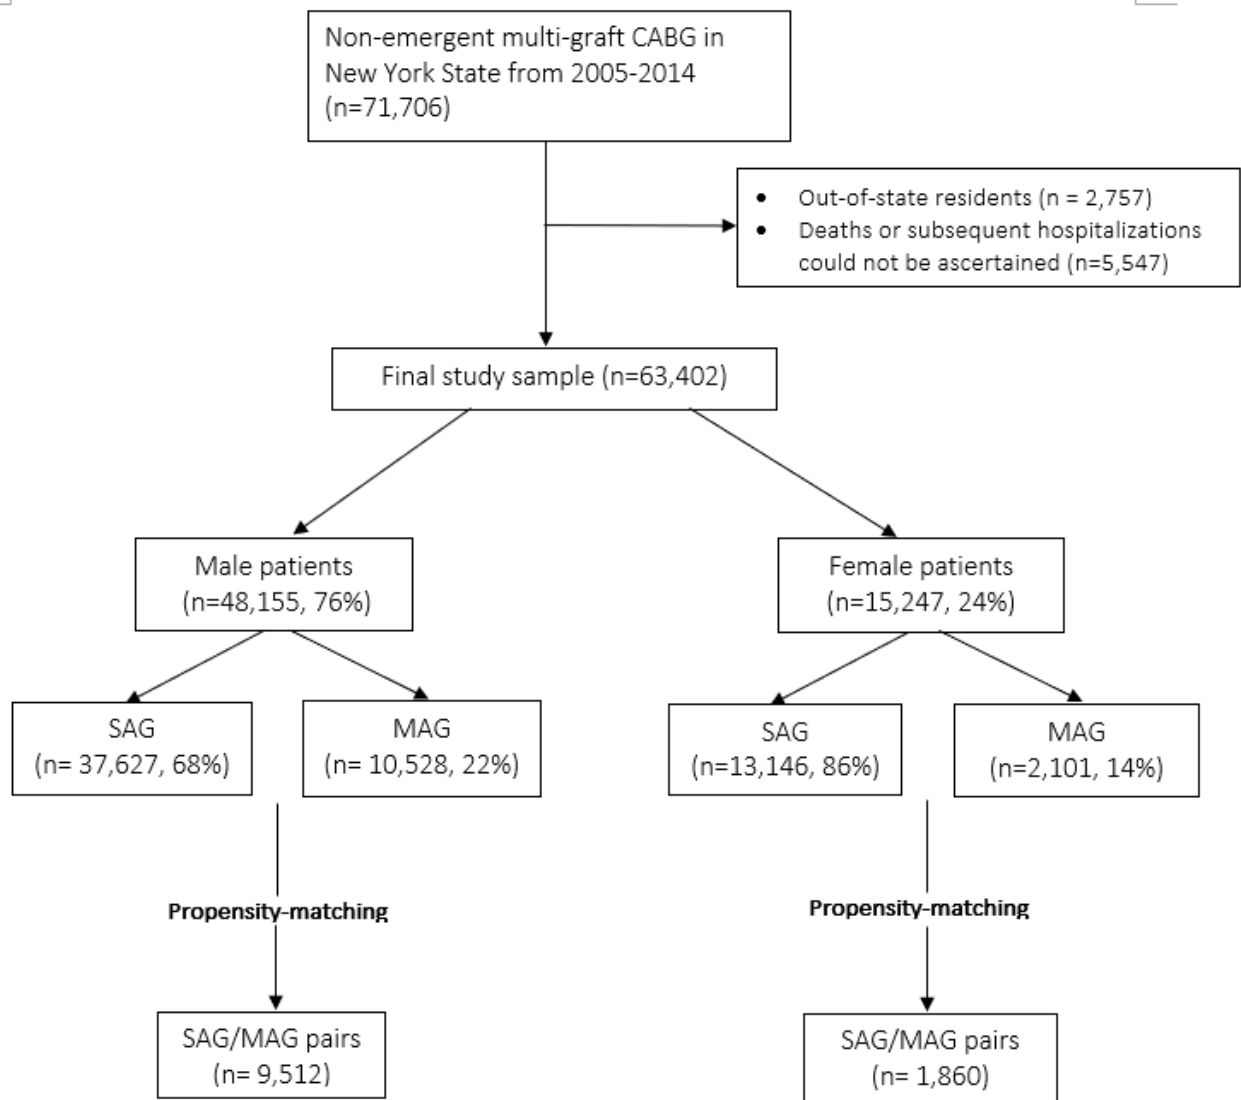

**eTable 1.** Provider Volume and Baseline Patient Characteristics of Male Patients Undergoing Single-Arterial and Multiple-Arterial Isolated-Coronary Artery Bypass Grafting (CABG) Surgery in New York State From 2005-2014

| Variable                                          | Overall N (%) | Single arterial grafting N (%) | Multiple arterial grafting N (%) | SD   |
|---------------------------------------------------|---------------|--------------------------------|----------------------------------|------|
| <b>Vessels diseased</b>                           |               |                                |                                  |      |
| • <i>LM disease</i>                               | 13744 (28.5)  | 10948 (29.1)                   | 2796 (26.6)                      | 5.7  |
| • <i>Proximal LAD</i>                             | 26935 (55.9)  | 21188 (56.3)                   | 5747 (54.6)                      | 3.5  |
| <b>2-vessel disease</b>                           |               |                                |                                  |      |
| • <i>LAD and LCX</i>                              | 7166 (14.9)   | 5589 (14.9)                    | 1577 (15.0)                      | 0.4  |
| • <i>LAD and RCA</i>                              | 7743 (16.1)   | 6150 (16.3)                    | 1593 (15.1)                      | 3.3  |
| • <i>LCX and RCA</i>                              | 2803 (5.8)    | 2158 (5.7)                     | 645 (6.1)                        | 1.7  |
| <b>3-vessel disease</b>                           | 30443 (63.2)  | 23730 (63.1)                   | 6713 (63.8)                      | 1.4  |
| <b>Previous AMI</b>                               |               |                                |                                  |      |
| • <i>0-23 Hours</i>                               | 407 (0.8)     | 340 (0.9)                      | 67 (0.6)                         | 3.1  |
| • <i>1-7 Days</i>                                 | 8821 (18.3)   | 7003 (18.6)                    | 1818 (17.3)                      | 3.5  |
| • <i>8-14 Days</i>                                | 2039 (4.2)    | 1648 (4.4)                     | 391 (3.7)                        | 3.4  |
| • <i>15-20 Days</i>                               | 382 (0.8)     | 323 (0.9)                      | 59 (0.6)                         | 3.6  |
| • <i>≥21 Days</i>                                 | 11314 (23.5)  | 9020 (24.0)                    | 2294 (21.8)                      | 5.2  |
| <b>Left ventricular ejection fraction</b>         |               |                                |                                  |      |
| • <i>&lt;20%</i>                                  | 729 (1.5)     | 650 (1.7)                      | 79 (0.8)                         | 8.8  |
| • <i>20-29%</i>                                   | 3102 (6.4)    | 2649 (7.0)                     | 453 (4.3)                        | 11.9 |
| • <i>30-39%</i>                                   | 5585 (11.6)   | 4650 (12.4)                    | 935 (8.9)                        | 11.3 |
| • <i>40-49%</i>                                   | 9840 (20.4)   | 7809 (20.8)                    | 2031 (19.3)                      | 3.7  |
| <b>CHF, current</b>                               | 5043 (10.5)   | 4383 (11.6)                    | 660 (6.3)                        | 18.9 |
| <b>CHF, past</b>                                  | 1399 (2.9)    | 1184 (3.1)                     | 215 (2.0)                        | 7.0  |
| <b>Extensive aortic atherosclerosis</b>           | 2196 (4.6)    | 1796 (4.8)                     | 400 (3.8)                        | 4.8  |
| <b>Hepatic failure</b>                            | 8 (0.0)       | 7 (0.0)                        | 1 (0.0)                          | 0.8  |
| <b>Renal dysfunction</b>                          |               |                                |                                  |      |
| • <i>Serum creatinine 1.3-1.5</i>                 | 7218 (15.0)   | 5888 (15.6)                    | 1330 (12.6)                      | 8.7  |
| • <i>Serum creatinine 1.6-2.0</i>                 | 3209 (6.7)    | 2726 (7.2)                     | 483 (4.6)                        | 11.3 |
| • <i>Serum creatinine ≥2.1</i>                    | 1407 (2.9)    | 1231 (3.3)                     | 176 (1.7)                        | 10.3 |
| <b>Renal dialysis</b>                             | 1126 (2.3)    | 1048 (2.8)                     | 78 (0.7)                         | 15.6 |
| <b>Previous PCI, current admission</b>            | 726 (1.5)     | 562 (1.5)                      | 164 (1.6)                        | 0.5  |
| <b>Previous PCI, before current admission</b>     | 10205 (21.2)  | 7962 (21.2)                    | 2243 (21.3)                      | 0.4  |
| <b>Surgeon average annual CABG Volume, &lt;75</b> | 17477 (36.3)  | 14358 (38.2)                   | 3119 (29.6)                      | 18.1 |
| <b>Surgeon average annual CABG Volume, 75-150</b> | 22329 (46.4)  | 16075 (42.7)                   | 6254 (59.4)                      | 33.8 |

|                                          |              |              |             |      |
|------------------------------------------|--------------|--------------|-------------|------|
| Surgeon average annual CABG Volume, >150 | 8349 (17.3)  | 7194 (19.1)  | 1155 (11.0) | 22.9 |
| Surgery priority                         |              |              |             |      |
| • Urgent                                 | 32023 (66.5) | 25836 (68.7) | 6187 (58.8) | 20.7 |
| • Elective                               | 16132 (33.5) | 11791 (31.3) | 4341 (41.2) | 20.7 |

AMI: acute myocardial infarction; CHF: congestive heart failure; LAD: left anterior descending artery; LCX: left circumflex artery; LM: left main; PCI: Percutaneous Coronary Intervention; RCA: right coronary artery; SD: standardized difference

**eTable 2.** Provider Volume and Baseline Patient Characteristics of Female Patients Undergoing Single-Arterial (SAG) and Multiple-Arterial (MAG) Isolated-Coronary Artery Bypass Grafting (CABG) Surgery in New York State From 2005-2014

| Variable                                          | Overall N (%) | Single arterial grafting N (%) | Multiple arterial grafting N (%) | SD   |
|---------------------------------------------------|---------------|--------------------------------|----------------------------------|------|
| <b>Vessels diseased</b>                           |               |                                |                                  |      |
| • <i>LM disease</i>                               | 4125 (27.1)   | 3568 (27.1)                    | 557 (26.5)                       | 1.4  |
| • <i>Proximal LAD</i>                             | 8400 (55.1)   | 7289 (55.4)                    | 1111 (52.9)                      | 5.2  |
| <b>2-vessel disease</b>                           |               |                                |                                  |      |
| • <i>LAD and LCX</i>                              | 2355 (15.4)   | 2035 (15.5)                    | 320 (15.2)                       | 0.7  |
| • <i>LAD and RCA</i>                              | 2710 (17.8)   | 2347 (17.9)                    | 363 (17.3)                       | 1.5  |
| • <i>LCX and RCA</i>                              | 920 (6.0)     | 776 (5.9)                      | 144 (6.9)                        | 3.9  |
| <b>3-vessel disease</b>                           | 9262 (60.7)   | 7988 (60.8)                    | 1274 (60.6)                      | 0.3  |
| <b>Previous AMI</b>                               |               |                                |                                  |      |
| • <i>0-23 Hours</i>                               | 121 (0.8)     | 106 (0.8)                      | 15 (0.7)                         | 1.1  |
| • <i>1-7 Days</i>                                 | 3082 (20.2)   | 2708 (20.6)                    | 374 (17.8)                       | 7.1  |
| • <i>8-14 Days</i>                                | 972 (6.4)     | 858 (6.5)                      | 114 (5.4)                        | 4.6  |
| • <i>15-20 Days</i>                               | 182 (1.2)     | 160 (1.2)                      | 22 (1.0)                         | 1.6  |
| • <i>≥21 Days</i>                                 | 3064 (20.1)   | 2673 (20.3)                    | 391 (18.6)                       | 4.4  |
| <b>Left ventricular ejection fraction</b>         |               |                                |                                  |      |
| • <i>&lt;20%</i>                                  | 137 (0.9)     | 126 (1.0)                      | 11 (0.5)                         | 5.1  |
| • <i>20-29%</i>                                   | 736 (4.8)     | 673 (5.1)                      | 63 (3.0)                         | 10.8 |
| • <i>30-39%</i>                                   | 1486 (9.7)    | 1327 (10.1)                    | 159 (7.6)                        | 8.9  |
| • <i>40-49%</i>                                   | 2670 (17.5)   | 2334 (17.8)                    | 336 (16.0)                       | 4.7  |
| <b>CHF, current</b>                               | 2381 (15.6)   | 2148 (16.3)                    | 233 (11.1)                       | 15.3 |
| <b>CHF, past</b>                                  | 580 (3.8)     | 528 (4.0)                      | 52 (2.5)                         | 8.7  |
| <b>Extensive aortic atherosclerosis</b>           | 1018 (6.7)    | 883 (6.7)                      | 135 (6.4)                        | 1.2  |
| <b>Hepatic failure</b>                            | 2 (0.0)       | 2 (0.0)                        | 0 (0.0)                          | 1.7  |
| <b>Renal dysfunction</b>                          |               |                                |                                  |      |
| • <i>Serum creatinine 1.3-1.5</i>                 | 1455 (9.5)    | 1292 (9.8)                     | 163 (7.8)                        | 7.3  |
| • <i>Serum creatinine 1.6-2.0</i>                 | 870 (5.7)     | 788 (6.0)                      | 82 (3.9)                         | 9.7  |
| • <i>Serum creatinine ≥2.1</i>                    | 477 (3.1)     | 423 (3.2)                      | 54 (2.6)                         | 3.9  |
| <b>Renal dialysis</b>                             | 433 (2.8)     | 409 (3.1)                      | 24 (1.1)                         | 13.7 |
| <b>Previous PCI, current admission</b>            | 212 (1.4)     | 184 (1.4)                      | 28 (1.3)                         | 0.6  |
| <b>Previous PCI, before current admission</b>     | 2862 (18.8)   | 2469 (18.8)                    | 393 (18.7)                       | 0.2  |
| <b>Surgeon average annual CABG Volume, &lt;75</b> | 5555 (36.4)   | 4976 (37.9)                    | 579 (27.6)                       | 22.1 |
| <b>Surgeon average annual CABG Volume, 75-150</b> | 7050 (46.2)   | 5716 (43.5)                    | 1334 (63.5)                      | 41.0 |

|                                          |              |             |             |      |
|------------------------------------------|--------------|-------------|-------------|------|
| Surgeon average annual CABG Volume, >150 | 2642 (17.3)  | 2454 (18.7) | 188 (8.9)   | 28.5 |
| Surgery priority                         |              |             |             |      |
| • Urgent                                 | 10825 (71.0) | 9451 (71.9) | 1374 (65.4) | 14.0 |
| • Elective                               | 4422 (29.0)  | 3695 (28.1) | 727 (34.6)  | 14.0 |

AMI: acute myocardial infarction; CHF: congestive heart failure; LAD: left anterior descending artery; LCX: left circumflex artery; LM: left main; PCI: Percutaneous Coronary Intervention; RCA: right coronary artery; SD: standardized difference

**eTable 3.** Provider Volume and Baseline Characteristics of Propensity-Matched Male Patients Undergoing Single-Arterial and Multiple-Arterial Isolated-Coronary Artery Bypass Grafting (CABG) Surgery in New York State From 2005-2014

| Variable                                  | Overall N (%) | Single arterial grafting N (%) | Multiple arterial grafting N (%) | ASD |
|-------------------------------------------|---------------|--------------------------------|----------------------------------|-----|
| Number of patients                        | 19024         | 9512                           | 9512                             | -   |
| Age, years                                | 61.1 (± 9.5)  | 61.1 (± 9.5)                   | 61.2 (± 9.4)                     | 1.4 |
| Body surface area, m <sup>2</sup>         | 2.1 (± 0.2)   | 2.1 (± 0.3)                    | 2.1 (± 0.2)                      | 0.9 |
| Risk Score                                | 5.0 (± 2.5)   | 5.0 (± 2.5)                    | 5.0 (± 2.5)                      | 0.7 |
| High Risk (≥9)                            | 1723 (9.1)    | 824 (8.7)                      | 899 (9.5)                        | 2.7 |
| Low Risk (<9)                             | 17301 (90.9)  | 8688 (91.3)                    | 8613 (90.5)                      | 2.7 |
| Off-pump surgery                          | 3810 (20.0)   | 1915 (20.1)                    | 1895 (19.9)                      | 0.5 |
| Incomplete revascularization              | 3466 (18.2)   | 1733 (18.2)                    | 1733 (18.2)                      | 0.0 |
| Number of conduits ≤3                     | 3791 (19.9)   | 1929 (20.3)                    | 1862 (19.6)                      | 1.8 |
| Age, ≥ 70 years                           | 3566 (18.7)   | 1783 (18.7)                    | 1783 (18.7)                      | 0.0 |
| <b>Vessels diseased</b>                   |               |                                |                                  |     |
| • LM disease                              | 4578 (24.1)   | 2289 (24.1)                    | 2289 (24.1)                      | 0.0 |
| • Proximal LAD                            | 10466 (55.0)  | 5233 (55.0)                    | 5233 (55.0)                      | 0.0 |
| <b>2-vessel disease</b>                   |               |                                |                                  |     |
| • LAD and LCX                             | 2636 (13.9)   | 1318 (13.9)                    | 1318 (13.9)                      | 0.0 |
| • LAD and RCA                             | 2838 (14.9)   | 1408 (14.8)                    | 1430 (15.0)                      | 0.6 |
| • LCX and RCA                             | 1122 (5.9)    | 572 (6.0)                      | 550 (5.8)                        | 1.0 |
| <b>3-vessel disease</b>                   | 12428 (65.3)  | 6214 (65.3)                    | 6214 (65.3)                      | 0.0 |
| <b>Previous AMI</b>                       |               |                                |                                  |     |
| • 0-23 Hours                              | 111 (0.6)     | 54 (0.6)                       | 57 (0.6)                         | 0.4 |
| • 1-7 Days                                | 2901 (15.2)   | 1452 (15.3)                    | 1449 (15.2)                      | 0.1 |
| • 8-14 Days                               | 666 (3.5)     | 296 (3.1)                      | 370 (3.9)                        | 4.2 |
| • 15-20 Days                              | 98 (0.5)      | 47 (0.5)                       | 51 (0.5)                         | 0.6 |
| • ≥21 Days                                | 4349 (22.9)   | 2216 (23.3)                    | 2133 (22.4)                      | 2.1 |
| <b>Left ventricular ejection fraction</b> |               |                                |                                  |     |
| • <20%                                    | 142 (0.7)     | 70 (0.7)                       | 72 (0.8)                         | 0.2 |
| • 20-29%                                  | 826 (4.3)     | 410 (4.3)                      | 416 (4.4)                        | 0.3 |
| • 30-39%                                  | 1658 (8.7)    | 833 (8.8)                      | 825 (8.7)                        | 0.3 |
| • 40-49%                                  | 3548 (18.7)   | 1766 (18.6)                    | 1782 (18.7)                      | 0.4 |
| Peripheral vascular disease               | 1820 (9.6)    | 933 (9.8)                      | 887 (9.3)                        | 1.6 |
| Cerebrovascular disease                   | 2293 (12.1)   | 1147 (12.1)                    | 1146 (12.0)                      | 0.0 |
| CHF, current                              | 1161 (6.1)    | 582 (6.1)                      | 579 (6.1)                        | 0.1 |
| CHF, past                                 | 418 (2.2)     | 221 (2.3)                      | 197 (2.1)                        | 1.7 |
| COPD                                      | 2779 (14.6)   | 1443 (15.2)                    | 1336 (14.0)                      | 3.2 |
| Extensive aortic atherosclerosis          | 697 (3.7)     | 352 (3.7)                      | 345 (3.6)                        | 0.4 |
| Diabetes                                  | 5914 (31.1)   | 2999 (31.5)                    | 2915 (30.6)                      | 1.9 |



|                                            |              |             |             |     |
|--------------------------------------------|--------------|-------------|-------------|-----|
| Hepatic failure                            | 0 (0.0)      | 0 (0.0)     | 0 (0.0)     | --- |
| Renal dysfunction                          |              |             |             |     |
| • Serum creatinine 1.3-1.5                 | 2476 (13.0)  | 1223 (12.9) | 1253 (13.2) | 0.9 |
| • Serum creatinine 1.6-2.0                 | 614 (3.2)    | 297 (3.1)   | 317 (3.3)   | 1.2 |
| • Serum creatinine ≥2.1                    | 242 (1.3)    | 127 (1.3)   | 115 (1.2)   | 1.1 |
| Renal dialysis                             | 112 (0.6)    | 60 (0.6)    | 52 (0.5)    | 1.1 |
| Previous PCI, current admission            | 287 (1.5)    | 142 (1.5)   | 145 (1.5)   | 0.3 |
| Previous PCI, before current admission     | 4113 (21.6)  | 2098 (22.1) | 2015 (21.2) | 2.1 |
| Previous cardiac surgery                   | 304 (1.6)    | 150 (1.6)   | 154 (1.6)   | 0.3 |
| Surgeon average annual CABG Volume, <75    | 6038 (31.7)  | 3091 (32.5) | 2947 (31.0) | 3.3 |
| Surgeon average annual CABG Volume, 75-150 | 10808 (56.8) | 5358 (56.3) | 5450 (57.3) | 2.0 |
| Surgeon average annual CABG Volume, >150   | 2178 (11.4)  | 1063 (11.2) | 1115 (11.7) | 1.7 |
| Surgery priority                           |              |             |             |     |
| • Urgent                                   | 11241 (59.1) | 5661 (59.5) | 5580 (58.7) | 1.7 |
| • Elective                                 | 7783 (40.9)  | 3851 (40.5) | 3932 (41.3) | 1.7 |

AMI: acute myocardial infarction; ASD: adjusted standardized difference; CHF: congestive heart failure; COPD: chronic obstructive pulmonary disease; LAD: left anterior descending artery; LCX: left circumflex artery; LM: left main; PCI: Percutaneous Coronary Intervention; RCA: right coronary artery

**eTable 4.** Provider Volume and Baseline Characteristics of Propensity-Matched Female Patients Undergoing Single-Arterial (SAG) and Multiple-Arterial (MAG) Isolated-Coronary Artery Bypass Grafting (CABG) Surgery in New York State From 2005-2014

| Variable                           | Overall<br>N (%) | Single arterial<br>grafting<br>N (%) | Multiple arterial<br>grafting<br>N (%) | ASD |
|------------------------------------|------------------|--------------------------------------|----------------------------------------|-----|
| Number of patients                 | 3720             | 1860                                 | 1860                                   | -   |
| Age, years                         | 65.1 (±10.3)     | 65.0 (±10.3)                         | 65.2 (±10.3)                           | 2.3 |
| Body surface area, m <sup>2</sup>  | 1.9 (±0.2)       | 1.9 (±0.2)                           | 1.9 (±0.2)                             | 0.9 |
| Risk Score                         | 6.2 (±2.6)       | 6.2 (±2.5)                           | 6.2 (±2.7)                             | 1.3 |
| High Risk (≥9)                     | 680 (18.3)       | 318 (17.1)                           | 362 (19.5)                             | 6.1 |
| Low Risk (<9)                      | 3040 (81.7)      | 1542 (82.9)                          | 1498 (80.5)                            | 6.1 |
| Off-pump surgery                   | 778 (20.9)       | 369 (19.8)                           | 409 (22.0)                             | 5.3 |
| Incomplete revascularization       | 782 (21.0)       | 391 (21.0)                           | 391 (21.0)                             | 0.0 |
| Number of conduits ≤3              | 933 (25.1)       | 469 (25.2)                           | 464 (24.9)                             | 0.6 |
| Age, ≥ 70 years                    | 1278 (34.4)      | 639 (34.4)                           | 639 (34.4)                             | 0.0 |
| Vessels diseased                   |                  |                                      |                                        |     |
| • LM disease                       | 866 (23.3)       | 433 (23.3)                           | 433 (23.3)                             | 0.0 |
| • Proximal LAD                     | 1993 (53.6)      | 1009 (54.2)                          | 984 (52.9)                             | 2.7 |
| 2-vessel disease                   |                  |                                      |                                        |     |
| • LAD and LCX                      | 506 (13.6)       | 253 (13.6)                           | 253 (13.6)                             | 0.0 |
| • LAD and RCA                      | 626 (16.8)       | 320 (17.2)                           | 306 (16.5)                             | 2.0 |
| • LCX and RCA                      | 226 (6.1)        | 106 (5.7)                            | 120 (6.5)                              | 3.2 |
| 3-vessel disease                   | 2362 (63.5)      | 1181 (63.5)                          | 1181 (63.5)                            | 0.0 |
| Previous AMI                       |                  |                                      |                                        |     |
| • 0-23 Hours                       | 16 (0.4)         | 7 (0.4)                              | 9 (0.5)                                | 1.6 |
| • 1-7 Days                         | 540 (14.5)       | 271 (14.6)                           | 269 (14.5)                             | 0.3 |
| • 8-14 Days                        | 196 (5.3)        | 92 (4.9)                             | 104 (5.6)                              | 2.9 |
| • 15-20 Days                       | 36 (1.0)         | 17 (0.9)                             | 19 (1.0)                               | 1.1 |
| • ≥21 Days                         | 733 (19.7)       | 376 (20.2)                           | 357 (19.2)                             | 2.6 |
| Left ventricular ejection fraction |                  |                                      |                                        |     |
| • <20%                             | 20 (0.5)         | 11 (0.6)                             | 9 (0.5)                                | 1.5 |
| • 20-29%                           | 101 (2.7)        | 50 (2.7)                             | 51 (2.7)                               | 0.3 |
| • 30-39%                           | 274 (7.4)        | 141 (7.6)                            | 133 (7.2)                              | 1.6 |
| • 40-49%                           | 559 (15.0)       | 274 (14.7)                           | 285 (15.3)                             | 1.7 |
| Peripheral vascular disease        | 499 (13.4)       | 239 (12.8)                           | 260 (14.0)                             | 3.3 |
| Cerebrovascular disease            | 719 (19.3)       | 354 (19.0)                           | 365 (19.6)                             | 1.5 |
| CHF, current                       | 375 (10.1)       | 182 (9.8)                            | 193 (10.4)                             | 2.0 |
| CHF, past                          | 93 (2.5)         | 47 (2.5)                             | 46 (2.5)                               | 0.3 |
| COPD                               | 754 (20.3)       | 383 (20.6)                           | 371 (19.9)                             | 1.6 |
| Extensive aortic atherosclerosis   | 220 (5.9)        | 115 (6.2)                            | 105 (5.6)                              | 2.3 |
| Diabetes                           | 1614 (43.4)      | 800 (43.0)                           | 814 (43.8)                             | 1.5 |

|                                            |             |             |             |     |
|--------------------------------------------|-------------|-------------|-------------|-----|
| Hepatic failure                            | 0 (0.0)     | 0 (0.0)     | 0 (0.0)     | --- |
| Renal dysfunction                          |             |             |             |     |
| • Serum creatinine 1.3-1.5                 | 307 (8.3)   | 154 (8.3)   | 153 (8.2)   | 0.2 |
| • Serum creatinine 1.6-2.0                 | 108 (2.9)   | 54 (2.9)    | 54 (2.9)    | 0.0 |
| • Serum creatinine ≥2.1                    | 64 (1.7)    | 34 (1.8)    | 30 (1.6)    | 1.7 |
| Renal dialysis                             | 26 (0.7)    | 11 (0.6)    | 15 (0.8)    | 2.6 |
| Previous PCI, current admission            | 46 (1.2)    | 23 (1.2)    | 23 (1.2)    | 0.0 |
| Previous PCI, before current admission     | 718 (19.3)  | 365 (19.6)  | 353 (19.0)  | 1.6 |
| Previous cardiac surgery                   | 60 (1.6)    | 38 (2.0)    | 22 (1.2)    | 6.8 |
| Surgeon average annual CABG Volume, <75    | 1139 (30.6) | 596 (32.0)  | 543 (29.2)  | 6.2 |
| Surgeon average annual CABG Volume, 75-150 | 2240 (60.2) | 1099 (59.1) | 1141 (61.3) | 4.6 |
| Surgeon average annual CABG Volume, >150   | 341 (9.2)   | 165 (8.9)   | 176 (9.5)   | 2.0 |
| Surgery priority                           |             |             |             |     |
| • Urgent                                   | 2384 (64.1) | 1195 (64.2) | 1189 (63.9) | 0.7 |
| • Elective                                 | 1336 (35.9) | 665 (35.8)  | 671 (36.1)  | 0.7 |

AMI: acute myocardial infarction; ASD: adjusted standardized difference; CHF: congestive heart failure; COPD: chronic obstructive pulmonary disease; LAD: left anterior descending artery; LCX: left circumflex artery; LM: left main; PCI: Percutaneous Coronary Intervention; RCA: right coronary artery

**eTable 5.** Operative (In-Hospital/30 day) Mortality Rates of Female and Male Propensity Matched Patients

MAG: multiple arterial grafting; SAG: single arterial grafting

|               | Number of pairs | MAG (%)   | SAG (%)   | P-value (McNemar) |
|---------------|-----------------|-----------|-----------|-------------------|
| <b>Female</b> | 2093            | 30 (1.43) | 23 (1.10) | 0.33              |
| <b>Male</b>   | 10481           | 76 (0.73) | 77 (0.73) | 0.93              |

**eTable 6.** Seven-Year Mortality Rates of Propensity-Matched Risk-Stratified Female and Male Patients According to Different Low Risk Score Cut-Offs After Multiple- (MAG) vs Single-Arterial (SAG) Coronary Artery Bypass Grafting in New York State Between 2005-2014

| Outcome                 | Multiple arterial grafting |                        | Single arterial grafting |                        | Adjusted hazard ratio (95% confidence interval) | P-value |
|-------------------------|----------------------------|------------------------|--------------------------|------------------------|-------------------------------------------------|---------|
|                         | Patients at risk           | Adverse event (KM-est) | Patients at risk         | Adverse event (KM-est) |                                                 |         |
| <b>Female</b>           |                            |                        |                          |                        |                                                 |         |
| Overall                 | 999                        | 362 (20.0)             | 972                      | 386 (21.5)             | 0.92 (0.80-1.07)                                | 0.29    |
| Risk score (11 or less) | 971                        | 293 (17.5)             | 935                      | 337 (20.0)             | 0.87 (0.74-1.02)                                | 0.08    |
| Risk score (10 or less) | 940                        | 252 (15.9)             | 900                      | 301 (18.9)             | 0.83 (0.70-0.98)                                | 0.03    |
| Risk score (9 or less)  | 903                        | 207 (13.9)             | 859                      | 265 (17.7)             | 0.78 (0.65-0.94)                                | 0.008   |
| Risk score (8 or less)  | 869                        | 183 (13.0)             | 834                      | 233 (16.3)             | 0.80 (0.65-0.97)                                | 0.02    |
| Risk score (7 or less)  | 719                        | 124 (11.0)             | 693                      | 157 (13.5)             | 0.79 (0.62-1.00)                                | 0.05    |
| <b>Male</b>             |                            |                        |                          |                        |                                                 |         |
| Overall                 | 5408                       | 1058 (11.9)            | 5301                     | 1263 (14.2)            | 0.83 (0.77-0.90)                                | <0.001  |
| Risk score (11 or less) | 5354                       | 919 (10.7)             | 5244                     | 1125 (13.0)            | 0.83 (0.76-0.90)                                | <0.001  |
| Risk score (10 or less) | 5293                       | 835 (9.9)              | 5183                     | 1047 (12.4)            | 0.82 (0.74-0.89)                                | <0.001  |
| Risk score (9 or less)  | 5244                       | 796 (9.6)              | 5146                     | 993 (11.9)             | 0.83 (0.75-0.91)                                | <0.001  |
| Risk score (8 or less)  | 5081                       | 681 (8.6)              | 4980                     | 882 (11.1)             | 0.80 (0.73-0.89)                                | <0.001  |
| Risk score (7 or less)  | 4562                       | 504 (7.2)              | 4462                     | 692 (9.8)              | 0.76 (0.67-0.85)                                | <0.001  |

KM est = Kaplan-Meier estimate

**eTable 7.** Fully Adjusted Cox Regression Models Evaluating the Effect of Multiple Arterial Grafting (MAG) on Death in the Overall Population

MAG: multiple arterial grafting

| Variable                                      | Hazard ratio MAG/SAG | P-value |
|-----------------------------------------------|----------------------|---------|
| MAG (hazard ratio MAG/SAG)                    | 0.53 (0.46-0.61)     | <0.001  |
| Female (hazard ratio MAG/SAG)                 | 1.44 (1.26-1.64)     | <0.001  |
| Risk score (hazard ratio MAG/SAG)             | 1.28 (1.27-1.29)     | 0.04    |
| MAG-female sex interaction coefficient        | 1.13 (1.01-1.28)     | <0.001  |
| MAG-risk score interaction coefficient        | 1.06 (1.04-1.08)-    | <0.001  |
| Female sex-risk score interaction coefficient | 0.96 (0.95-0.98)     | <0.001  |

**eTable 8.** Landmark Analysis of Alive Female and Male Low- and High-Risk Patients at 30 Days

| Patient group | Multiple arterial grafting |                   | Single arterial grafting |                   | Adjusted hazard ratio (95% confidence interval) | P-value |
|---------------|----------------------------|-------------------|--------------------------|-------------------|-------------------------------------------------|---------|
|               | Patients at risk           | Survival (KM-est) | Patients at risk         | Survival (KM-est) |                                                 |         |
| <b>Female</b> |                            |                   |                          |                   |                                                 |         |
| Low risk      | 862                        | 171 (12.4)        | 828                      | 223 (15.9)        | 0.78 (0.64-0.95)                                | 0.01    |
| High risk     | 126                        | 163 (46.2)        | 136                      | 141 (41.2)        | 1.06 (0.84-1.34)                                | 0.61    |
|               |                            |                   |                          |                   |                                                 |         |
| <b>Male</b>   |                            |                   |                          |                   |                                                 |         |
| Low risk      | 5058                       | 633 (8.2)         | 4958                     | 836 (10.7)        | 0.79 (0.71-0.88)                                | <0.001  |
| High risk     | 322                        | 348 (42.4)        | 313                      | 352 (43.1)        | 0.94 (0.81-1.10)                                | 0.46    |

KM est = Kaplan-Meier estimate

**eTable 9.** Sensitivity Analysis Using Gamma Testing

|                                                                                                                                                                                                                                                                                                                                                                                                                                                                                                                         |         |         |            |         |
|-------------------------------------------------------------------------------------------------------------------------------------------------------------------------------------------------------------------------------------------------------------------------------------------------------------------------------------------------------------------------------------------------------------------------------------------------------------------------------------------------------------------------|---------|---------|------------|---------|
| <p>Comparing K-M survival curves for propensity-matched samples using Klein Moeschberger test</p> <ul style="list-style-type: none"> <li>• Male: <math>p &lt; 0.001</math></li> <li>• Female: <math>p = 0.49</math></li> </ul> <p>Comparing K-M survival free from major adverse cardiac and cerebrovascular event curves for propensity-matched samples using Klein Moeschberger test</p> <ul style="list-style-type: none"> <li>• Male: <math>p &lt; 0.001</math></li> <li>• Female: <math>p = 0.94</math></li> </ul> |         |         |            |         |
| <i>7-year mortality</i>                                                                                                                                                                                                                                                                                                                                                                                                                                                                                                 |         |         |            |         |
| <b>Female</b>                                                                                                                                                                                                                                                                                                                                                                                                                                                                                                           |         |         |            |         |
| Sensitivity Analysis for Klein and Moeschberger's Test                                                                                                                                                                                                                                                                                                                                                                                                                                                                  |         |         |            |         |
| Gamma                                                                                                                                                                                                                                                                                                                                                                                                                                                                                                                   | P plus  | P neg   | P lower    | P upper |
| 1.00                                                                                                                                                                                                                                                                                                                                                                                                                                                                                                                    | 0.50000 | 0.50000 | 0.51864    | 0.51864 |
| 1.05                                                                                                                                                                                                                                                                                                                                                                                                                                                                                                                    | 0.51220 | 0.48780 | 0.22530    | 0.93752 |
| 1.10                                                                                                                                                                                                                                                                                                                                                                                                                                                                                                                    | 0.52381 | 0.47619 | 0.07957    | 1.00000 |
| 1.15                                                                                                                                                                                                                                                                                                                                                                                                                                                                                                                    | 0.53488 | 0.46512 | 0.02323    | 1.00000 |
| 1.20                                                                                                                                                                                                                                                                                                                                                                                                                                                                                                                    | 0.54545 | 0.45455 | 0.00572    | 1.00000 |
| 1.25                                                                                                                                                                                                                                                                                                                                                                                                                                                                                                                    | 0.55556 | 0.44444 | 0.00121    | 1.00000 |
| <b>Male</b>                                                                                                                                                                                                                                                                                                                                                                                                                                                                                                             |         |         |            |         |
| Sensitivity Analysis for Klein and Moeschberger's Test                                                                                                                                                                                                                                                                                                                                                                                                                                                                  |         |         |            |         |
| Gamma                                                                                                                                                                                                                                                                                                                                                                                                                                                                                                                   | P plus  | P neg   | P lower    | P upper |
| 1.00                                                                                                                                                                                                                                                                                                                                                                                                                                                                                                                    | 0.50000 | 0.50000 | .000004877 | 0.00000 |
| 1.05                                                                                                                                                                                                                                                                                                                                                                                                                                                                                                                    | 0.51220 | 0.48780 | .000000020 | 0.00042 |
| 1.10                                                                                                                                                                                                                                                                                                                                                                                                                                                                                                                    | 0.52381 | 0.47619 | .000000000 | 0.01116 |
| 1.15                                                                                                                                                                                                                                                                                                                                                                                                                                                                                                                    | 0.53488 | 0.46512 | .000000000 | 0.11160 |
| 1.20                                                                                                                                                                                                                                                                                                                                                                                                                                                                                                                    | 0.54545 | 0.45455 | .000000000 | 0.49288 |
| 1.25                                                                                                                                                                                                                                                                                                                                                                                                                                                                                                                    | 0.55556 | 0.44444 | .000000000 | 1.00000 |
| <i>7-year major adverse cardiac and cerebrovascular events (MACCE)</i>                                                                                                                                                                                                                                                                                                                                                                                                                                                  |         |         |            |         |
| <b>Female</b>                                                                                                                                                                                                                                                                                                                                                                                                                                                                                                           |         |         |            |         |
| Sensitivity Analysis for Klein and Moeschberger's Test                                                                                                                                                                                                                                                                                                                                                                                                                                                                  |         |         |            |         |
| Gamma                                                                                                                                                                                                                                                                                                                                                                                                                                                                                                                   | P plus  | P neg   | P lower    | P upper |
| 1.00                                                                                                                                                                                                                                                                                                                                                                                                                                                                                                                    | 0.50000 | 0.50000 | 0.97180    | 0.97180 |
| 1.05                                                                                                                                                                                                                                                                                                                                                                                                                                                                                                                    | 0.51220 | 0.48780 | 0.46813    | 1.00000 |
| 1.10                                                                                                                                                                                                                                                                                                                                                                                                                                                                                                                    | 0.52381 | 0.47619 | 0.16654    | 1.00000 |



|      |         |         |         |         |
|------|---------|---------|---------|---------|
| 1.15 | 0.53488 | 0.46512 | 0.04425 | 1.00000 |
| 1.20 | 0.54545 | 0.45455 | 0.00898 | 1.00000 |
| 1.25 | 0.55556 | 0.44444 | 0.00143 | 1.00000 |

**Male**

Sensitivity Analysis for Klein and Moeschberger's Test

| Gamma | P plus  | P neg   | P lower    | P upper |
|-------|---------|---------|------------|---------|
| 1.00  | 0.50000 | 0.50000 | .000054523 | 0.00005 |
| 1.05  | 0.51220 | 0.48780 | .000000086 | 0.00657 |
| 1.10  | 0.52381 | 0.47619 | .000000000 | 0.14374 |
| 1.15  | 0.53488 | 0.46512 | .000000000 | 0.79244 |
| 1.20  | 0.54545 | 0.45455 | .000000000 | 1.00000 |
| 1.25  | 0.55556 | 0.44444 | .000000000 | 1.00000 |

**eTable 10.** Sensitivity Analysis Using E-Value

MACCE: Major adverse cardiac and cerebrovascular events

| Outcome       | E-value for point estimate | E-value for confidence interval |
|---------------|----------------------------|---------------------------------|
| <b>Female</b> |                            |                                 |
| Mortality     | 1.09                       | 1.00                            |
| MACCE         | 1.17                       | 1.00                            |
| <b>Male</b>   |                            |                                 |
| Mortality     | 1.61                       | 1.44                            |
| MACCE         | 1.48                       | 1.34                            |

**eTable 11.** Fully Adjusted Cox Regression Models Comparing Mortality Between Female and Male Patients Receiving Single Arterial Grafts (SAG), and Female and Male Patients Receiving Multiple Arterial Grafts (MAG)

| Patient group | Hazard ratio Female/Male | P-value |
|---------------|--------------------------|---------|
| SAG           | 1.08 (1.04-1.13)         | <0.001  |
| MAG           | 1.22 (1.07-1.38)         | <0.001  |
